# Supplementary material for: Characteristics of Microplastics and Their Affiliated PAHs in Surface Water in Ho Chi Minh City, Vietnam
Source: MDPI journal article supplement (doi:10.3390/polym14122450), 2022-06-16
Supplement: s1 [file s1]

## Supplementary Materials

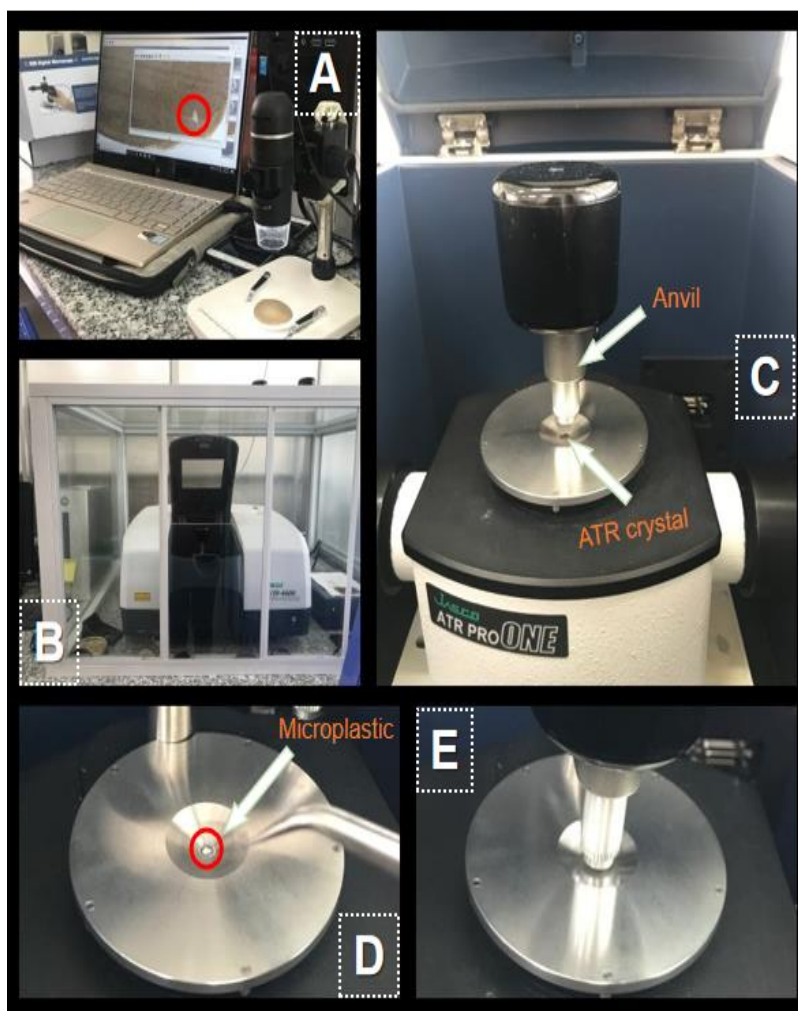

**Figure S1.** (A) Microplastics were observed on Micro Capture Plus. (B) The FT/IR-6600 FT-IR Spectrometer was used in the study. (C) Single point reflector ATR retrofit to the machine. One arrow points to the anvil, the other to the ZnSe ATR crystal. (D) Microplastics were placed on the crystal. (E) The anvil was lowered to press the microplastic onto the crystal for photo transmission into the sample.



|                     |             |              |
|---------------------|-------------|--------------|
| TH-LG-3             | 10° 44' 57" | 106° 38' 24" |
| TH-LG-4             | 10° 44' 4"  | 106° 38' 5"  |
| TH-LG-5             | 10° 43' 4"  | 106° 37' 35" |
| <b>Saigon River</b> |             |              |
| SG-1                | 10° 52' 4"  | 106° 42' 6"  |
| SG-2                | 10° 51' 57" | 106° 42' 31" |
| SG-3                | 10° 51' 37" | 106° 43' 2"  |
| SG-4                | 10° 49' 55" | 106° 42' 33" |
| SG-5                | 10° 49' 36" | 106° 42' 34" |
| SG-6                | 10° 49' 18" | 106° 42' 43" |
| SG-7                | 10° 48' 8"  | 106° 43' 30" |
| SG-8                | 10° 47' 60" | 106° 43' 34" |
| SG-9                | 10° 47' 46" | 106° 43' 35" |
| SG-10               | 10° 47' 13" | 106° 42' 31" |
| SG-11               | 10° 46' 9"  | 106° 42' 35" |
| SG-12               | 10° 45' 56" | 106° 42' 42" |
| SG-13               | 10° 44' 54" | 106° 44' 45" |
| SG-14               | 10° 44' 34" | 106° 45' 0"  |
| SG-15               | 10° 44' 28" | 106° 45' 27" |
| <b>Can Gio Sea</b>  |             |              |
| CG-1                | 10° 22' 53" | 106° 52' 35" |
| CG-2                | 10° 22' 15" | 106° 53' 40" |
| CG-3                | 10° 22' 15" | 106° 54' 34" |
| CG-4                | 10° 22' 28" | 106° 55' 17" |
| CG-5                | 10° 22' 41" | 106° 56' 5"  |
| CG-6                | 10° 22' 47" | 106° 56' 41" |
| CG-7                | 10° 22' 48" | 106° 57' 26" |
| CG-8                | 10° 22' 35" | 106° 58' 6"  |
| CG-9                | 10° 23' 4"  | 106° 59' 7"  |
| CG-10               | 10° 23' 30" | 106° 59' 4"  |
| CG-11               | 10° 23' 60" | 106° 58' 57" |
| CG-12               | 10° 24' 25" | 106° 58' 56" |
| CG-13               | 10° 24' 56" | 106° 58' 48" |
| CG-14               | 10° 25' 9"  | 106° 58' 38" |
| CG-15               | 10° 25' 17" | 106° 58' 21" |

**Table S2.** Characterization of MPs chemical composition in canals, Saigon River and Can Gio Sea in 2020

| Number | Plastic type | FTIR analysis |              |             |
|--------|--------------|---------------|--------------|-------------|
|        |              | Canal         | Saigon River | Can Gio Sea |
|        |              | (15 sites)    | (15 sites)   | (15 sites)  |
| 1      | PP           | 98            | 141          | 103         |

|              |                                     |     |     |     |
|--------------|-------------------------------------|-----|-----|-----|
| 2            | PE                                  | 63  | 133 | 102 |
| 3            | EVA                                 | 94  | 43  | 136 |
| 4            | ABS                                 | 18  | 1   | 10  |
| 5            | PS                                  | 6   | 0   | 4   |
| 6            | PET                                 | 8   | 1   | 8   |
| 7            | PA (Nylons)                         | 10  | 0   | 2   |
| 8            | PC                                  | 21  | 0   | 8   |
| 9            | PTFE or FEP                         | 1   | 0   | 0   |
| 10           | PMMA                                | 9   | 0   | 0   |
| 11           | PP/PE                               | 2   | 6   | 7   |
| 12           | PP/EVA                              | 37  | 0   | 2   |
| 13           | PE/ABS                              | 0   | 3   | 0   |
| 14           | Other (non-plastic or unidentified) | 48  | 41  | 9   |
| <b>Total</b> |                                     | 367 | 328 | 382 |

**Table S3.** PAHs concentration affiliated with MPs (mean  $\pm$  SD, min – max, unit: ng/g) in three aquatic environment in HCMC

| PAHs species (ng/g) | Canals (n = 15)                                          | Saigon River (n = 15)                                     | Can Gio Sea (n = 15)                                       |
|---------------------|----------------------------------------------------------|-----------------------------------------------------------|------------------------------------------------------------|
| Ace                 | ND                                                       | 18.19 $\pm$ 26.75<br>(0.53 - 66.94)                       | ND                                                         |
| Flu                 | 123.13 $\pm$ 166.2<br>(5.1 - 610.3)                      | 40.31 $\pm$ 29.7<br>(9.57 - 109.91)                       | <b>123.22 <math>\pm</math> 224.14</b><br>(4.36 - 822.66)   |
| Phe                 | <b>225.6 <math>\pm</math> 272.14</b><br>(4.56 - 1269.29) | <b>109.7 <math>\pm</math> 142.98</b><br>(3.08 - 554.15)   | <b>367.88 <math>\pm</math> 532.95</b><br>(56.45 - 2153.34) |
| AnT                 | 8.72 $\pm$ 12.85<br>(0.03 - 41.39)                       | 11.45 $\pm$ 10.75<br>(1.39 - 45.77)                       | 11.19 $\pm$ 9.97<br>(0.83 - 27.2)                          |
| Flt                 | 90.07 $\pm$ 80.8<br>(2.59 - 261.85)                      | <b>186.28 <math>\pm</math> 101.35</b><br>(84.24 - 470.22) | <b>134.61 <math>\pm</math> 179.51</b><br>(1.17 - 655.54)   |
| Pyr                 | 97.92 $\pm$ 132.93<br>(1.4 - 697.83)                     | <b>174.94 <math>\pm</math> 100</b><br>(64.98 - 496.11)    | <b>250.06 <math>\pm</math> 415.04</b><br>(27.12 - 1654.2)  |
| BaA                 | 69.4 $\pm$ 164.59<br>(0.18 - 719.04)                     | 87.05 $\pm$ 45.51<br>(23.88 - 183.75)                     | 79.47 $\pm$ 140.87<br>(1.02 - 541.93)                      |
| Chr                 | 62.56 $\pm$ 90.88<br>(0.72 - 389.6)                      | 84.76 $\pm$ 46.85<br>(29.81 - 215.63)                     | 78.93 $\pm$ 96.88<br>(2.24 - 282.86)                       |
| BbF                 | <b>708.84 <math>\pm</math> 1436.89</b><br>(0 - 6939.68)  | 49.68 $\pm$ 76.99<br>(2.75 - 234.15)                      | <b>123.15 <math>\pm</math> 104.79</b><br>(27.33 - 416.97)  |
| BkF                 | 12.5 $\pm$ 18.76<br>(0.42 - 67.78)                       | 18.79 $\pm$ 17.46<br>(4.66 - 77.85)                       | 22.02 $\pm$ 23.44<br>(0.03 - 68.94)                        |

|              |                                          |                                       |                                           |
|--------------|------------------------------------------|---------------------------------------|-------------------------------------------|
| <b>BaP</b>   | 27.1 ± 61.16<br>(0.77 - 219.2)           | 25.53 ± 30.73<br>(1.72 - 126.33)      | 12.35 ± 15.21<br>(0.16 - 42.25)           |
| <b>DbahA</b> | ND                                       | 46.98 ± 56.47<br>(0.89 - 187.53)      | 74.86 ± 66.24<br>(3.25 - 203.42)          |
| <b>BghiP</b> | 56.88 ± 43.16<br>(1.52 - 164.6)          | 67.58 ± 118.47<br>(6.62 - 490.17)     | 72.78 ± 49.87<br>(4.17 - 180.08)          |
| <b>InP</b>   | <b>236.9 ± 370.88</b><br>(6.74 - 1369.8) | 20.5 ± 20.27<br>(3.78 - 90.58)        | <b>178.42 ± 273.83</b><br>(1.26 - 947.33) |
| <b>Total</b> | 1070.34 ± 1613.93<br>(30.94 - 8940.99)   | 926.68 ± 695.55<br>(432.95 - 3267.88) | 1398.99 ± 1612.14<br>(232.71 - 6448.66)   |

ND: non-detection

**Table S4.** The characteristic of MPs-affiliated PAHs collected in different types of aquatic environment among several studies in the world

| Site/ Country                                        | Types of environment | Number of PAH species | Concentration of total PAHs (ng/g) | Dominant PAH            | Source of PAHs                   |
|------------------------------------------------------|----------------------|-----------------------|------------------------------------|-------------------------|----------------------------------|
| Canals<br>(this study)                               | Canal                | 14                    | 30.94 – 8,940.99                   | BbF, InP, Phe,          | Petrogenic and pyrogenic sources |
| Saigon River (this study)                            | River                | 14                    | 432.95–3,267.88                    | Flt, Pyr, Phe           | Petrogenic and pyrogenic sources |
| Can Gio Sea (this study)                             | Sea                  | 14                    | 232.71–6,448.66                    | Phe, Pyr, Inp, BbF, Flt | Petrogenic sources               |
| Feilaixia reservoir, China<br>(Tan et al., 2019)     | Reservoir            | 16                    | 282.4-427.3                        | Chr, BghiP, Phe, InP    | Pyrogenic sources                |
| Huanghai Sea and Bohai Sea - China<br>[39]           | Sea                  | 16                    | 3,400-119,000                      | Phe, Pyr, Flu           | Petrogenic sources               |
| Zhengmingsi Beach and Dongshan Beach – China<br>[91] | Sea                  | 16                    | 136.3–1,586.9 and 397.6–2,384.2    | Phe, Chr                | Petrogenic and pyrogenic sources |

|                                                                            |     |    |          |                       |                       |
|----------------------------------------------------------------------------|-----|----|----------|-----------------------|-----------------------|
| Southwest coast of<br>Taiwan<br>[40]                                       | Sea | 15 | 104-3595 | Phe, Pyr, BaA         | Petrogenic<br>sources |
| Seal beach, USA<br>(Hirai et al., 2011)                                    | Sea | 19 | 79-656   | Phe, Flu, Pyr,<br>Chr | Petrogenic<br>sources |
| Thinh Long and<br>Tonking Bay<br>beaches – Vietnam<br>(Hirai et al., 2011) | Sea | 19 | 73–2,024 | Flu, Pyr, Phe,<br>Chr | Petrogenic<br>sources |
